# Supplementary material for: Chromatographic analysis of diverse fruit components using HPLC and UPLC
Source: Royal Society of Chemistry journal article supplement (doi:10.1039/c0ay00244e), 2010-01-01
Supplement: c0ay00244e.pdf [file c0ay00244e.pdf]

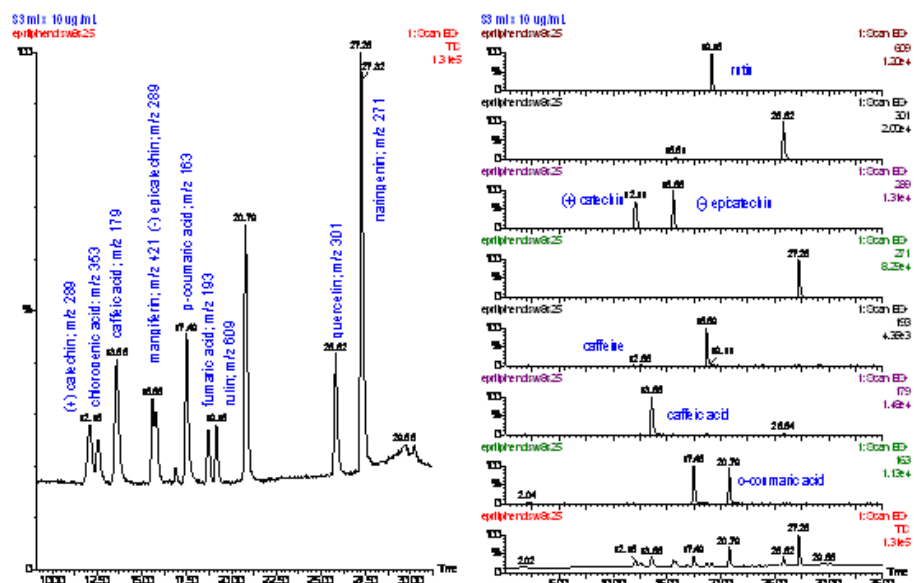

Figure 1 LC-ESI-MS/DAD profile of phenolic standard compounds in a XTerra™ MS C-18 column (Waters) connected to a XTerra™ MS C-18 guard column (Waters) eluted with 0.1% formic acid and acetonitrile

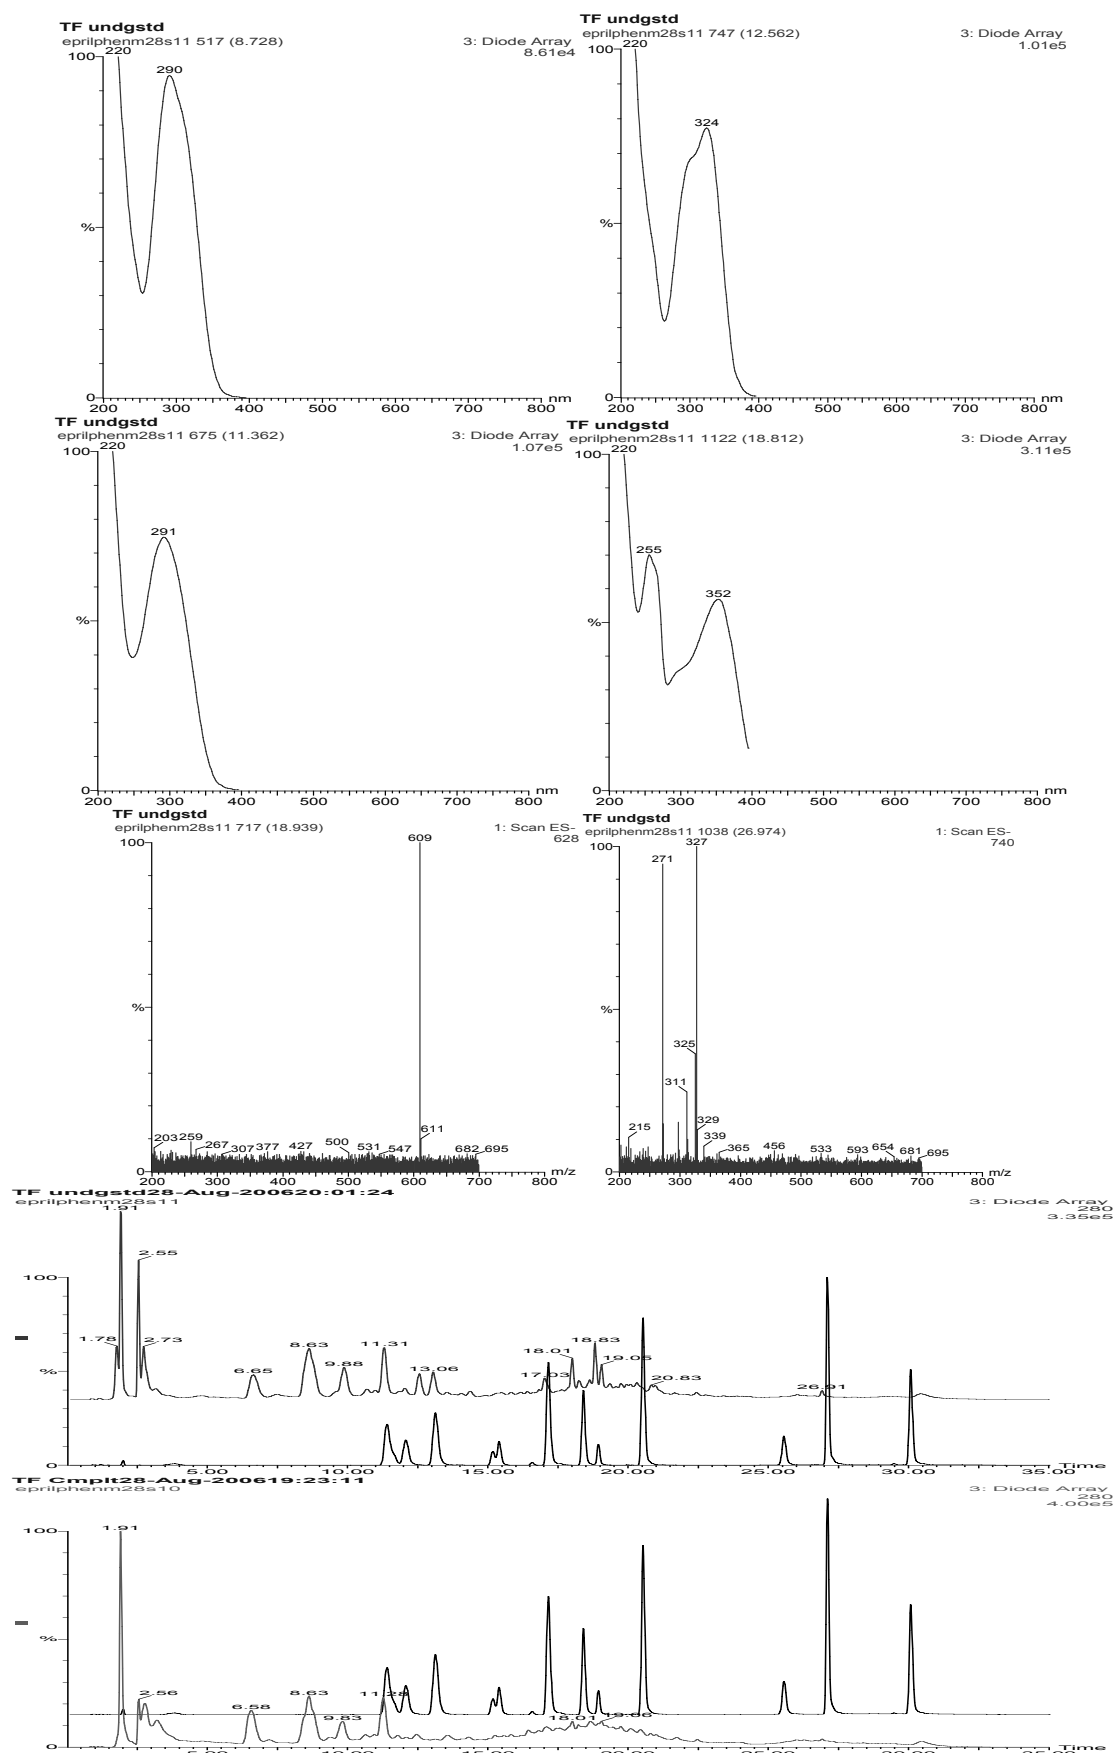

**Figure 2.** Phenolic analysis of fresh tomato during in vitro digestions; top – bottom panels: spectra and m/z diagrams, chromatograms of undigested tomato detected at 370 nm and 280 nm, and consecutive simulated gastric and intestinal digestion of tomato detected at 280 nm
